# Supplementary material for: Analysis of micro- and nanoscale heterogeneities within environmentally relevant thin films containing biological components, oxyanions and minerals using AFM-PTIR spectroscopy
Source: Royal Society of Chemistry journal article supplement (doi:10.1039/d3em00005b), 2023-01-01
Supplement: d3em00005b1.pdf [file d3em00005b1.pdf]

*Electronic Supplementary Information:*

Analysis of Micro- and Nanoscale Heterogeneities within Environmentally Relevant Thin Films  
Containing Biological Components, Oxyanions and Minerals Using AFM-IR Spectroscopy

Deborah Kim and Vicki H. Grassian\*

Department of Chemistry and Biochemistry, University of California San Diego, La Jolla, CA  
92037

\*Author to whom correspondence may be addressed. Email: [vhgrassian@ucsd.edu](mailto:vhgrassian@ucsd.edu)

**Electronic Supplementary Information Content:** This supporting information (SI) contains **2 figure** and **2 pages** in total.

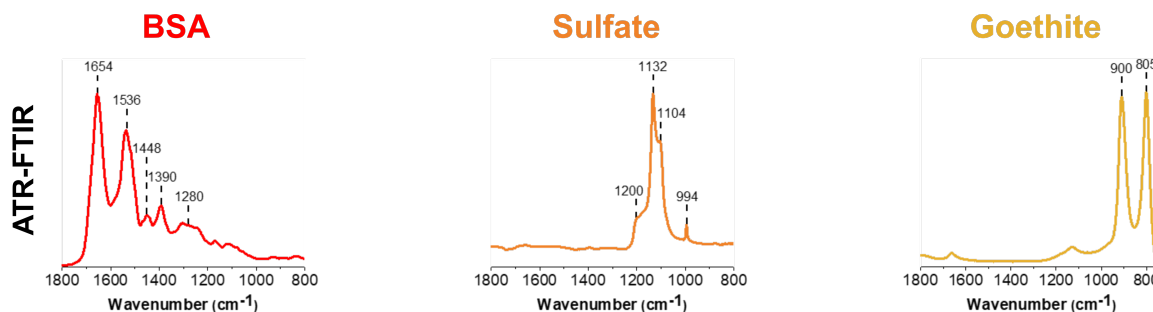

**Figure S1.** Normalized ATR-FTIR spectra of thin films of BSA, sulfate, and goethite on an AMTIR crystal.

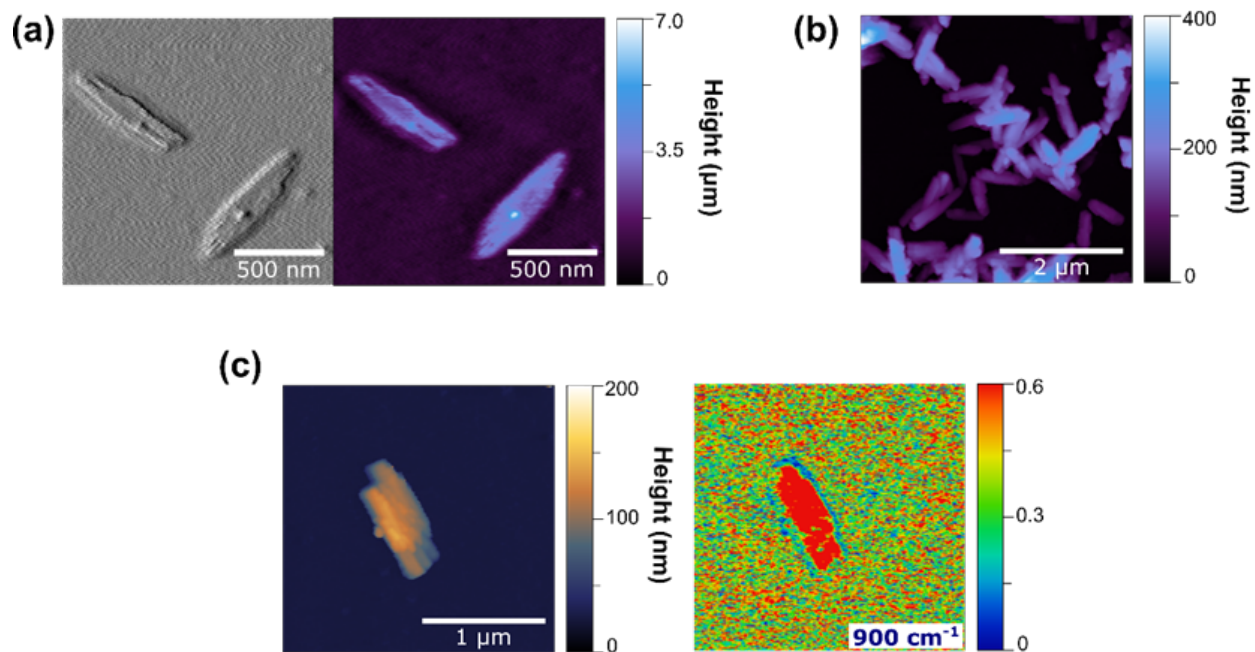

**Figure S2.** AFM images of  $\alpha$ -FeOOH nanoparticles (a) individually, over a 1.5 x 1.5  $\mu\text{m}$  region, and (b) as a cluster, over a 4 x 4  $\mu\text{m}$  region. These images confirm the rod-like shape of goethite nanoparticles as well as their natural behavior to aggregate into clusters. IR activity at 900  $\text{cm}^{-1}$  of the out-of-plane O-H bending mode is confirmed by the AFM image of a cluster of goethite nanoparticles and its corresponding AFM-PTIR spectral map.
